# Supplementary material for: Single-cell RNA-seq analysis of cancer-endothelial cell interactions in primary tumor and peritoneal metastasis from a single patient with colorectal cancer
Source: PubMed Central journal article supplement — BJC Rep. 2024 Nov 18;2:88. doi: 10.1038/s44276-024-00112-3 (PMC11573991; doi:10.1038/s44276-024-00112-3), 2024-11-18
Supplement: 44276_2024_112_MOESM1_ESM.pdf [file 44276_2024_112_MOESM1_ESM.pdf]

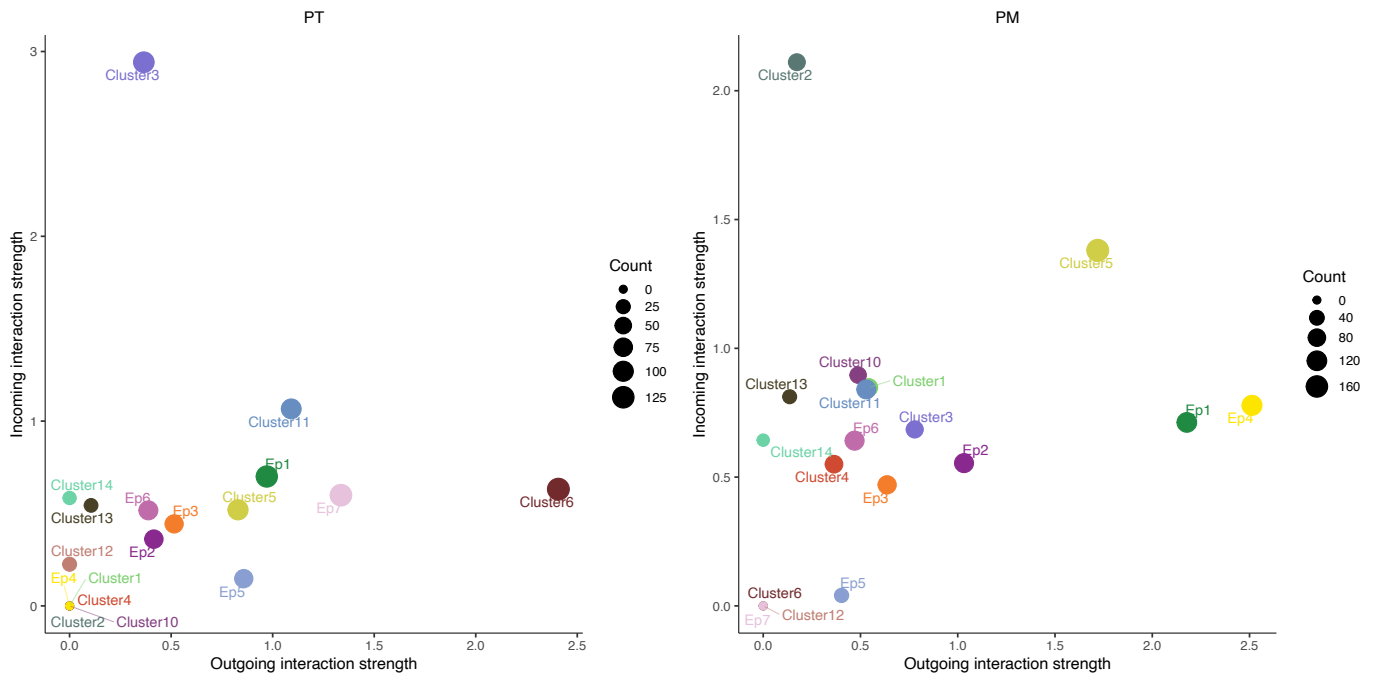

**Supplementary Figure 1.** Signaling role analysis on the aggregated cell-cell communication network for all TME clusters and epithelial clusters. The TME cluster numbers correspond to Fig. 1D.
